# Supplementary material for: Genome-Wide Association Study for Anthracycline-Induced Congestive Heart Failure
Source: Oxford University Press journal article supplement (doi:10.1158/1078-0432.ccr-16-0908), 2016-12-19
Supplement: 10780432ccr160908-sup-164860_3_supp_3656461_nd3knz.xlsx [file 10780432ccr160908-sup-164860_3_supp_3656461_nd3knz.xlsx]

## Sheet: Sheet1
Supplemental Table 1. Top SNPs associated with anthracycline induced CHF
Ch	RSID	BP	Effect (minor) Allele	Alternative (major) Allele	MAF	OR	Pvalue
14	rs2184559	56192541	G	A	0.10473	2.7109	2.76e-06
2	rs12614202	77688109	T	C	0.39882	0.37122	3.87e-06
20	rs12480103	52338770	A	G	0.29669	2.47005	4.94e-06
13	rs9557321	100521101	C	T	0.06213	2.6172	6.77e-06
2	rs7596623	12890650	C	T	0.099408	2.3731	6.78e-06
5	rs6883259	7440084	G	A	0.20558	2.13361	8.59e-06
5	rs766643	7446889	G	A	0.20712	2.111	8.92e-06
8	rs12545665	70373263	T	C	0.037278	2.3719	9.23e-06
15	rs28714259	23708527	A	G	0.08957	2.10137	9.25e-06
15	rs28684656	23708446	C	T	0.089569	2.10137	9.37e-06
18	rs4058287	55995721	G	A	0.48166	0.40637	9.68e-06
5	rs7710510	7427289	T	C	0.20592	2.12793	1.01e-05
15	rs1875910	23708851	T	C	0.090293	2.0806	1.03e-05
11	rs7111513	124733377	C	T	0.25089	2.0228	1.1e-05
8	rs11203734	15795898	G	A	0.050294	3.0757	1.17e-05
22	kgp8105491	46644177	A	G	0.055359	2.70863	1.19e-05
8	rs2410329	15818278	T	C	0.066675	3.1442	1.25e-05
3	rs9879227	193174782	C	T	0.069231	2.5118	1.32e-05
1	rs7522389	19973358	T	G	0.21361	2.6633	1.42e-05
20	rs76464104	22210602	T	C	0.0403	1.3797	1.59e-05
1	rs10857972	109384436	T	C	0.24615	0.31645	1.85e-05
1	rs6704266	109386174	G	A	0.24615	0.31645	1.85e-05
11	rs5017048	124734471	T	G	0.25148	2.0159	1.93e-05
13	rs1745836	47337846	C	T	0.23018	2.39492	1.96e-05
2	rs6752623	176950926	A	G	0.18106	2.5387	1.97e-05
4	rs13125385	32469424	A	C	0.081512	2.05204	1.98e-05
18	rs12051934	56004003	G	A	0.48166	0.40637	2.12e-05
12	rs7399293	19363948	T	C	0.08284	2.3821	2.18e-05
8	rs16908579	82007370	C	A	0.048114	2.5972	2.35e-05
8	rs1503366	68435226	C	T	0.36627	1.6512	2.38e-05
6	rs1204328	72427371	C	A	0.034316	3.0391	2.52e-05
22	rs4253763	46622600	C	T	0.061538	2.9039	2.61e-05
22	rs16983347	18900868	A	G	0.036686	3.643	2.71e-05
7	rs7777356	134519965	A	G	0.076331	2.6357	2.85e-05
8	rs11781908	68347055	A	G	0.17397	1.721	2.87e-05
10	rs7094302	77971599	C	T	0.17633	1.9479	2.9e-05
9	rs7869360	19712170	A	G	0.051479	2.133	2.92e-05
8	rs12548222	19977258	G	A	0.10827	2.0535	3.14e-05
8	rs7016422	15813380	A	G	0.069822	2.94455	3.19e-05
2	rs13397389	12907238	T	C	0.10827	2.1326	3.33e-05
6	rs115541994	32381939	C	T	0.33088	2.0888	3.36e-05
5	rs6871111	102273022	G	A	0.051651	2.2058	3.38e-05
22	rs7291763	46646162	A	C	0.049039	2.84034	3.49e-05
4	rs6449090	9884536	C	T	0.31302	2.5268	3.61e-05
4	rs10012367	40746613	G	A	0.40897	2.1457	3.66e-05
1	rs7523079	19962874	C	T	0.20941	2.4981	3.69e-05
3	rs11710776	106971327	C	T	0.12049	2.5112	3.76e-05
4	rs4697900	9859976	G	A	0.39645	2.3917	3.87e-05
5	rs32680	102191715	T	C	0.24094	2.1374	3.89e-05
11	rs10894749	133682252	A	G	0.42663	0.43956	4.02e-05
8	rs11779485	68390435	A	C	0.35621	1.659	4.04e-05
11	rs1365120	36438075	C	T	0.10397	2.22509	4.05e-05
2	rs13413220	12907151	C	T	0.10769	2.0013	4.07e-05
10	rs7068881	16838866	G	A	0.24379	2.515	4.27e-05
14	rs1354	55406992	A	G	0.030941	2.541	4.4e-05
4	kgp8283262	10272013	T	C	0.070496	3.0483	4.54e-05
6	rs2489944	161292913	T	C	0.17041	2.3786	4.69e-05
13	rs7994896	65528335	C	T	0.037434	2.74025	4.72e-05
13	rs925558	65524120	T	C	0.037453	2.7387	4.73e-05
3	rs13087409	118077682	C	A	0.090829	2.6647	4.74e-05
13	rs1513001	65526287	T	C	0.037457	2.7383	4.74e-05
9	rs7855757	19712378	C	T	0.054438	1.9963	4.88e-05
3	rs10510504	20797722	C	T	0.13254	0.12306	4.96e-05
8	rs4737838	68420477	C	A	0.35917	1.6363	5.01e-05
5	rs6860588	102280302	T	C	0.29882	2.0205	5.02e-05
8	rs7827961	68408438	T	C	0.34734	1.6585	5.05e-05
1	rs10753081	173443531	T	C	0.29512	1.8905	5.1e-05
13	rs12863645	101395935	G	T	0.14206	1.70707	5.21e-05
4	rs11727143	40739635	T	C	0.40947	2.16095	5.23e-05
22	rs11090819	46626506	A	G	0.058834	2.5337	5.32e-05
12	rs2238161	120804508	G	C	0.050861	3.029	5.45e-05
2	rs17014128	77689016	C	T	0.16686	0.19234	5.48e-05
17	rs10514983	49555822	A	G	0.049262	3.66502	5.5e-05
1	rs10798282	173437024	C	T	0.29704	1.87171	5.54e-05
16	rs1468171	13466323	C	T	0.19408	2.4209	5.62e-05
8	rs13273765	1146100	G	A	0.4716	1.96452	5.63e-05
3	rs779206	118023515	G	A	0.26154	0.431183	5.67e-05
2	rs11123997	105187436	A	G	0.14083	1.9756	5.67e-05
2	rs6746423	41267941	A	G	0.048518	2.5827	5.82e-05
7	rs10248605	26173027	G	A	0.11302	2.7813	5.89e-05
12	rs16950058	120750517	G	A	0.050888	3.0314	6.02e-05
12	rs5634	120762837	G	A	0.050888	3.0314	6.02e-05
8	rs7820882	68389059	T	C	0.34911	1.6446	6.1e-05
3	rs11715178	20764798	A	G	0.13697	0.118403	6.19e-05
18	rs1458866	30037985	C	T	0.15266	2.3575	6.22e-05
1	rs4916358	173423799	G	A	0.29822	1.86026	6.76e-05
4	kgp5440207	10326390	T	C	0.072134	2.9613	6.85e-05
13	rs342715	92383193	G	A	0.24438	0.283616	6.88e-05
5	rs11952361	102287920	G	A	0.30651	1.9422	7.01e-05
6	rs2465874	161298592	A	C	0.19165	2.32234	7.09e-05
6	rs2233980	31079644	A	G	0.07526	2.3601	7.44e-05
4	rs13148112	138118905	G	A	0.25621	1.96175	7.61e-05
5	rs3776874	102282317	T	C	0.3071	1.9363	7.81e-05
4	rs9684729	9862036	T	C	0.33669	2.4452	7.94e-05
4	rs6553973	177531472	T	C	0.22071	2.02482	8.34e-05
9	rs776777	18657487	A	C	0.44615	0.44926	8.36e-05
6	rs36022097	26995168	A	G	0.11481	2.45026	8.39e-05
13	rs171060	92387945	C	T	0.24154	0.287977	8.82e-05
7	rs17138749	116133098	C	A	0.15636	2.0484	8.86e-05
8	rs428300	142173356	C	T	0.36805	2.10722	8.9e-05
16	rs1018891	13457714	G	A	0.17396	2.43155	8.99e-05
5	rs250594	164065767	C	T	0.42594	2.0931	9.06e-05
15	rs4238475	94135579	A	C	0.36864	2.38675	9.06e-05
2	rs6722342	12888761	T	C	0.097041	2.1164	9.11e-05
8	rs12549742	15815994	T	G	0.041418	3.5172	9.3e-05
11	rs10836550	36427893	G	A	0.14142	2.2084	9.42e-05
10	rs7068265	16838417	G	A	0.29231	2.1813	9.56e-05
7	rs17162825	10298689	G	A	0.12899	2.4874	9.6e-05
16	rs886218	13464491	T	C	0.17337	2.44284	9.65e-05
14	rs7146775	55407757	A	G	0.031328	2.5023	9.7e-05
16	rs2188738	13441954	G	A	0.17465	2.4188	9.72e-05
4	kgp11734686	9912993	C	T	0.26172	2.16403	9.78e-05
